# Supplementary material
Source: publisher figshare collection journal article supplement (https://frontiersin.figshare.com/ndownloader/files/28676592)

**Figure S2.** Validations (permutation tests) of the PLS-DA model shown in this study.

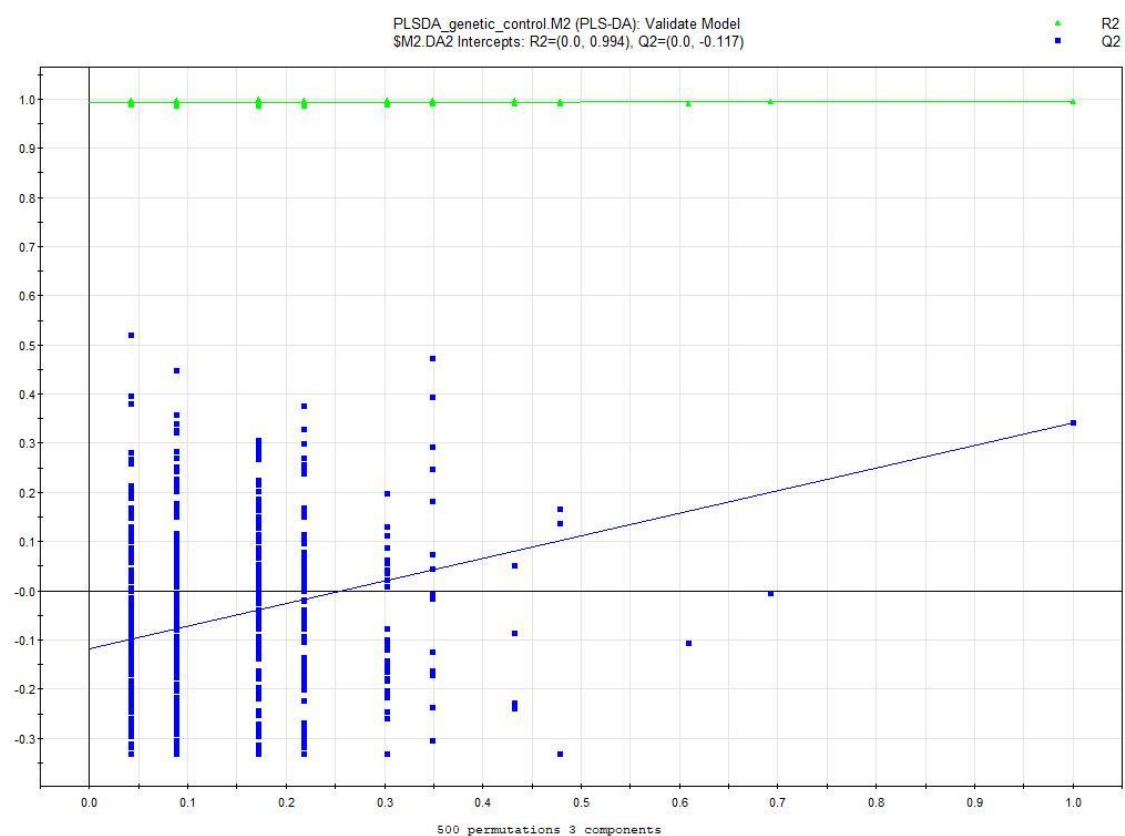

Supplement: Supplementary file 1 [file 28676592]
